# Supplementary material for: Determination of the presence of 5-methylcytosine in Paramecium tetraurelia
Source: PubMed Central journal article supplement (PMC6209305; doi:10.1371/journal.pone.0206667), 2018-10-31
Supplement: pone.0206667.s004.pdf [file pone.0206667.s004.pdf]

S4 Fig

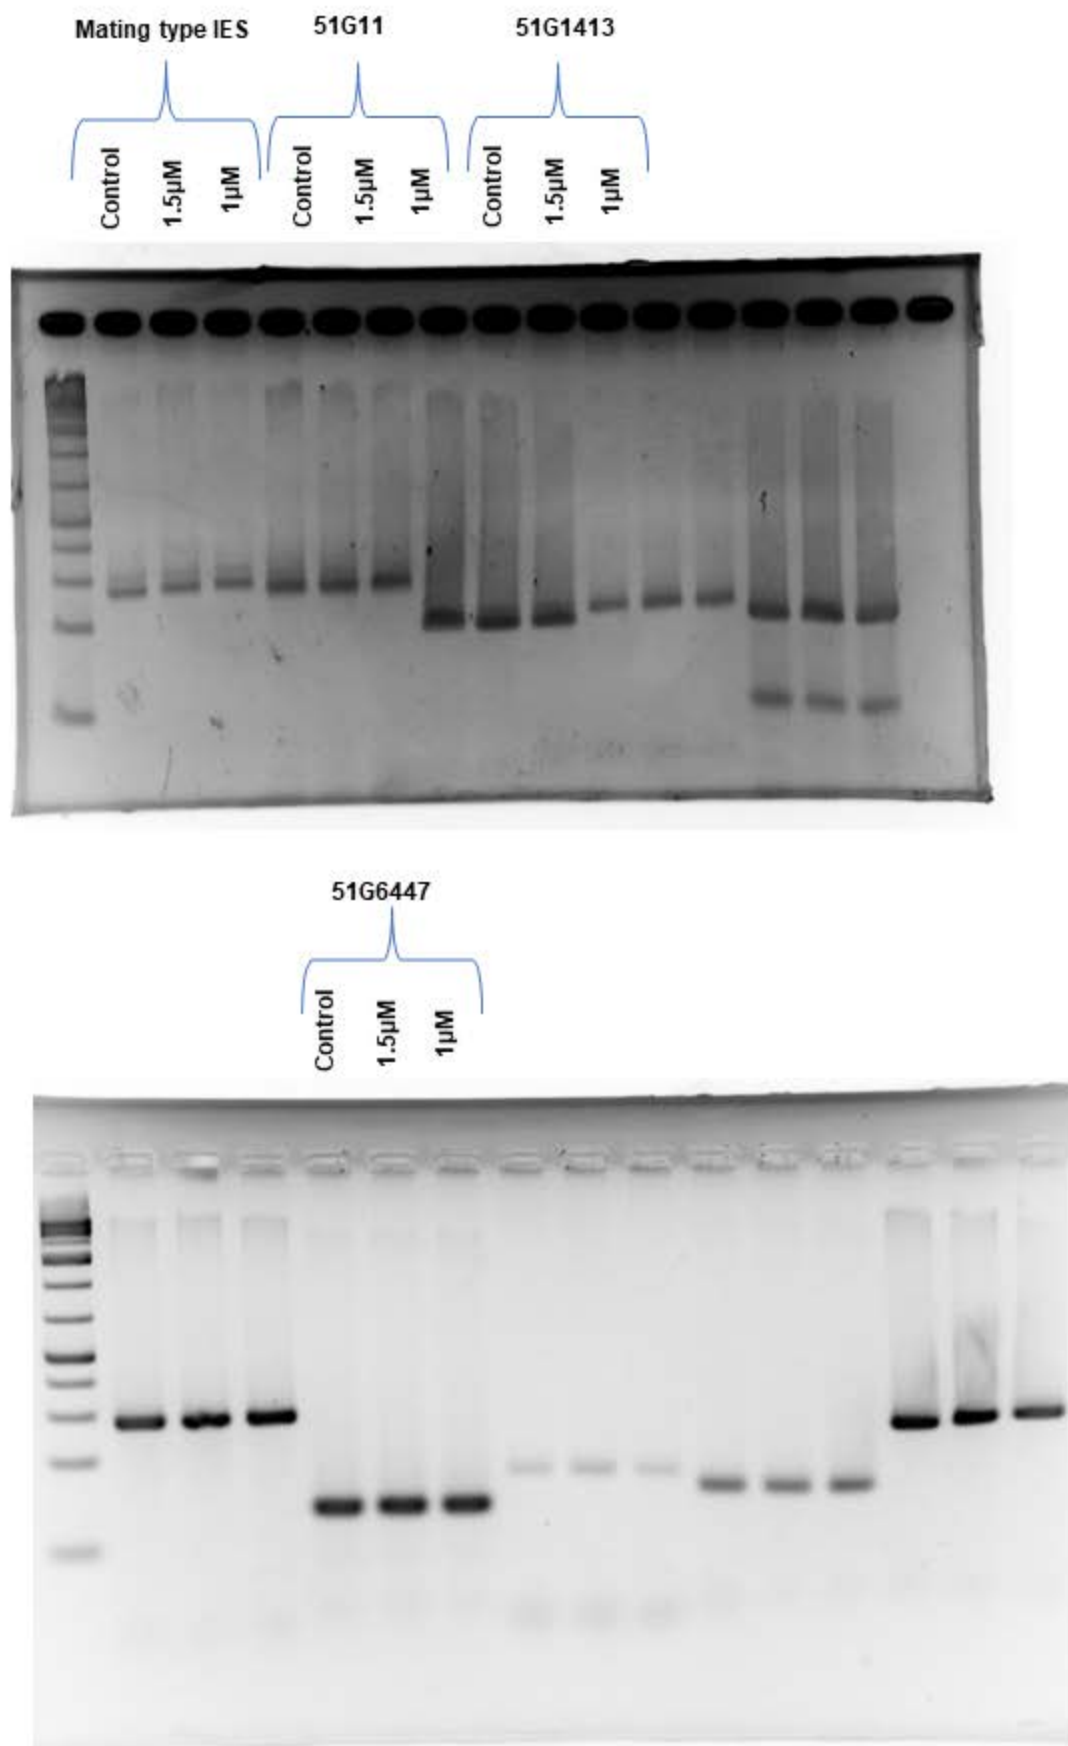

**S4 Fig:** Full length gels on IES Retention PCRs corresponding to Figure 1e.
