# Supplementary material for: Determination of the presence of 5-methylcytosine in Paramecium tetraurelia
Source: PubMed Central journal article supplement (PMC6209305; doi:10.1371/journal.pone.0206667), 2018-10-31
Supplement: pone.0206667.s006.pdf [file pone.0206667.s006.pdf]

**S6 Fig**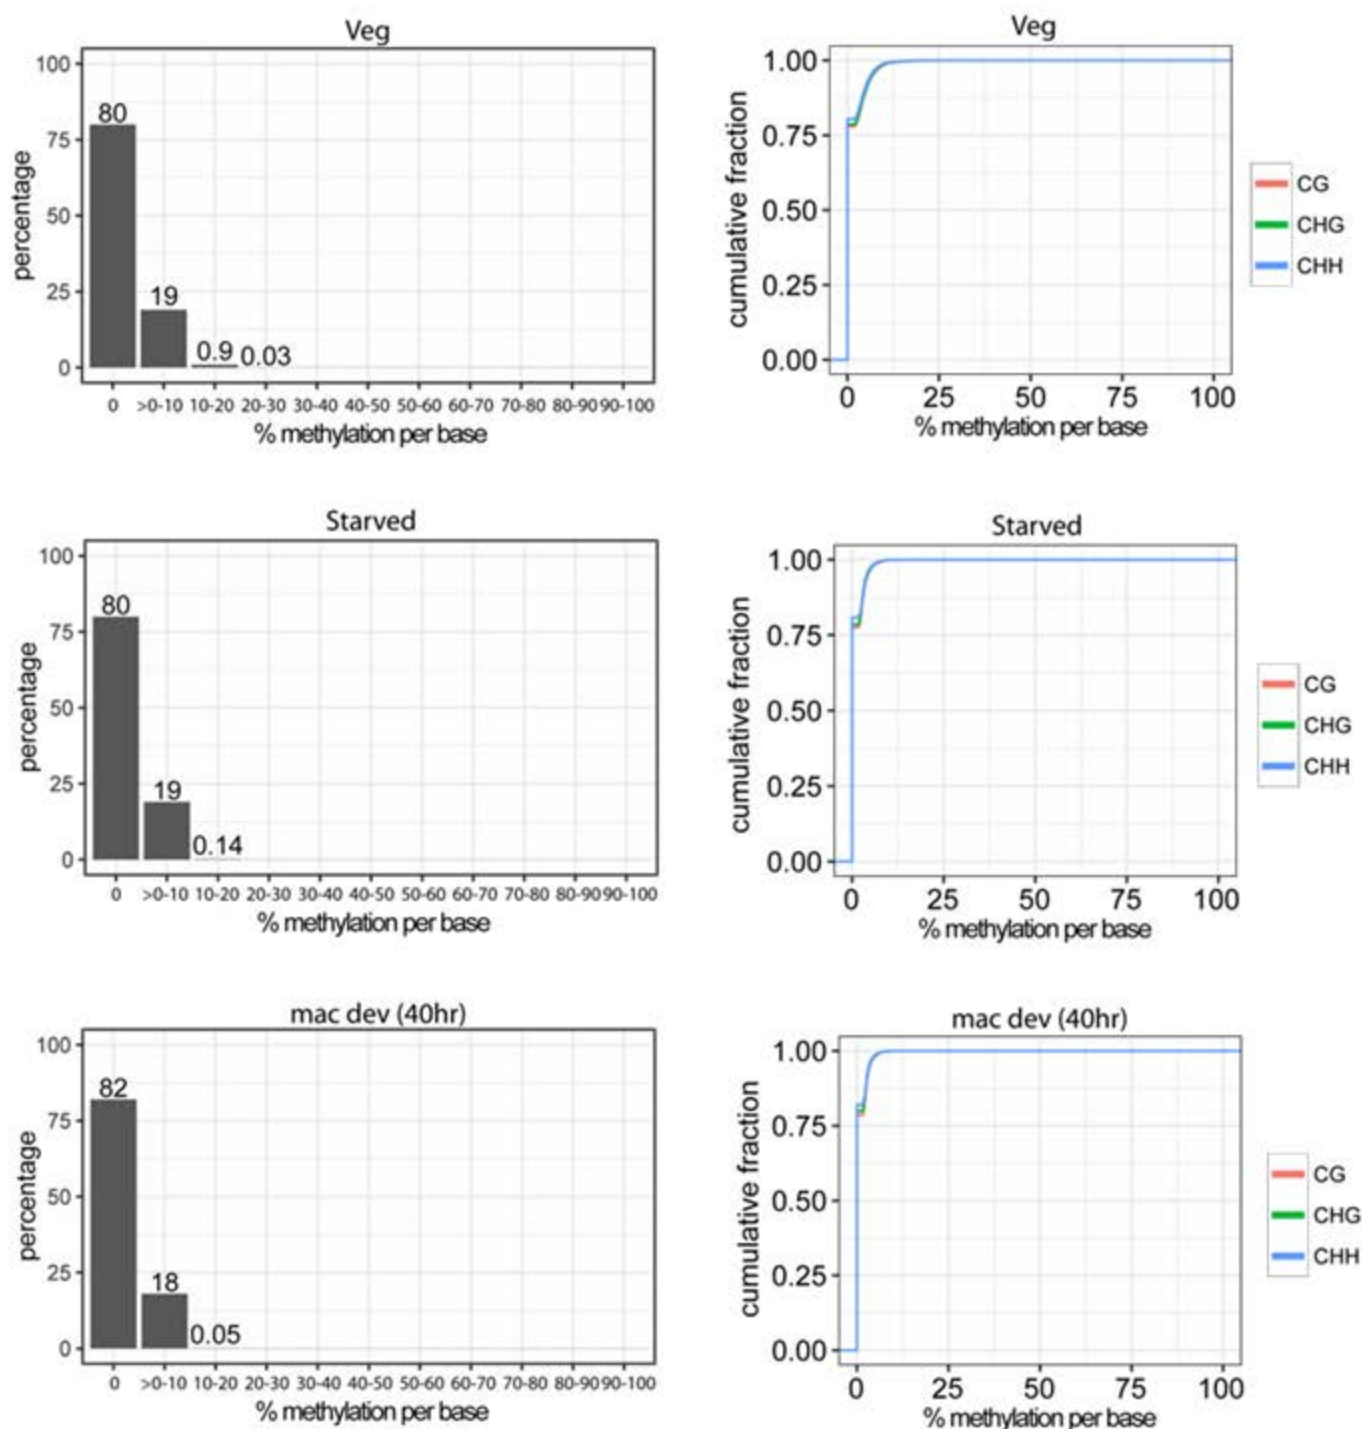

**S6 Fig:** Absence of evidence of C methylation in *Paramecium* mac genome. Left panel, percent calculated using  $C/(C + T)$  for each C in *Paramecium* genome. There was no bias in C conversion among the three different nucleotide contexts (right panel).
