# Supplementary material for: Determination of the presence of 5-methylcytosine in Paramecium tetraurelia
Source: PubMed Central journal article supplement (PMC6209305; doi:10.1371/journal.pone.0206667), 2018-10-31
Supplement: pone.0206667.s007.pdf [file pone.0206667.s007.pdf]

**S1 Table**

| <b>IES</b> | <b>Primer sequence (5' to 3' orientation)</b> |
|------------|-----------------------------------------------|
| 51G-11F    | ATCATAAGATTGATATCTTCTCCCTTCTCC                |
| 51G-11R    | ACTTGCTACTAAAGCAAGAAACATTGAGAG                |
| 51G1413F   | GAAGCTGCTTGTGTTAAGAATTCTACTGG                 |
| 51G1413R   | GCATCCAGCACTAGTTGAATTTACTGTAC                 |
| 51G6447F   | AATGCATCAAATGTAGTAACTACTCCTGCT                |
| 51G6447R   | AATTTGTAAAGTATCCAGCGCAGGCAG                   |
| MT Locus F | GGTGTTTATATCTTAATTGTTGACCCTCAC                |
| MT Locus R | CCATCTATACTCCATTCTTTATCTTAATTCAT              |

**S1 Table: List of primers.** List of primers to check IES retention PCRs
